# Supplementary material for: The Natural Alkaloid Palmatine Selectively Induces Mitophagy and Restores Mitochondrial Function in an Alzheimer’s Disease Mouse Model
Source: MDPI journal article supplement (doi:10.3390/ijms242216542), 2023-11-20
Supplement: s1 [file s1]

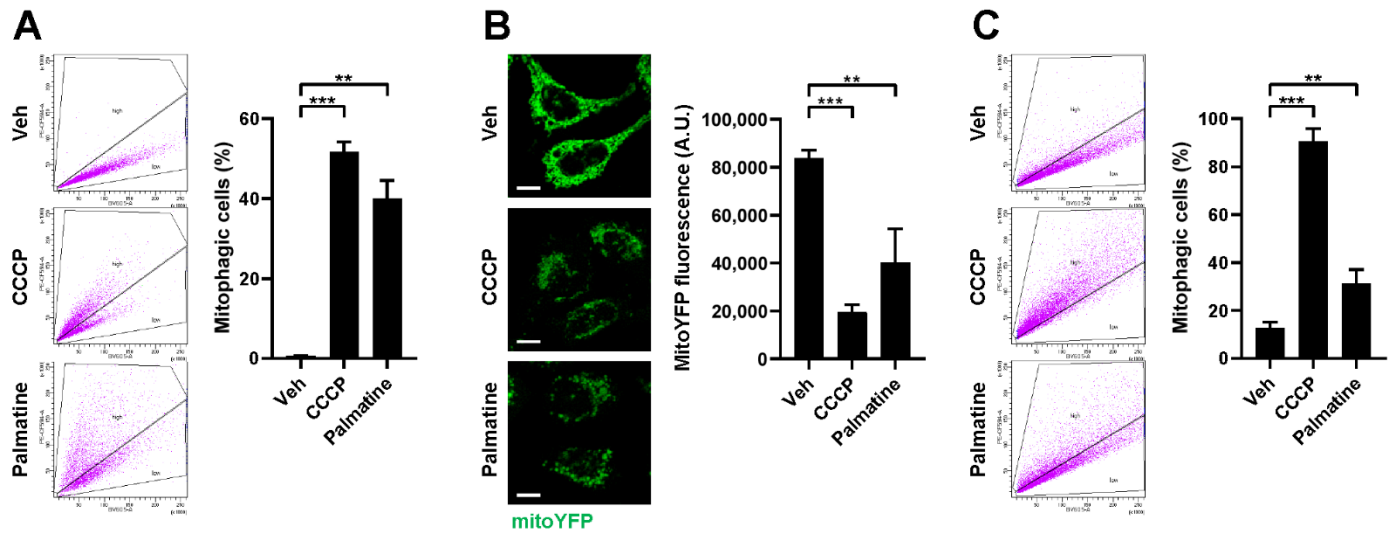

**Supplementary Figure S1. Verification of palmatine-induced mitophagy in various human cells.**

(A) HeLa-Parkin cells expressing mt-Keima were treated with CCCP (10  $\mu$ M) or palmatine (400  $\mu$ M) for 24 h. Mitophagy levels were analyzed by flow cytometry. (B) HeLa-Parkin cells expressing mitoYFP were treated with CCCP (10  $\mu$ M) or palmatine (400  $\mu$ M) for 24 h. The fluorescence intensity of mitoYFP was analyzed by confocal microscopy. Scale bar: 10  $\mu$ m. (C) A549 cells expressing mt-Keima were treated with CCCP (10  $\mu$ M) or palmatine (400  $\mu$ M) for 24 h. Mitophagy levels were analyzed by flow cytometry. The results from repeated experiments are shown as the mean  $\pm$  SD. Significance was determined by one-way ANOVA. \*\* $P$  <0.01; \* $P$  <0.001.
